# Supplementary material for: Family-focused practices in addictions: a scoping review protocol
Source: PubMed Central journal article supplement — BMJ Open. 2018 Jan 13;8(1):e019433. doi: 10.1136/bmjopen-2017-019433 (PMC5781095; doi:10.1136/bmjopen-2017-019433), 2018-01-13
Supplement: bmjopen-2017-019433.draft_revisions.pdf [file bmjopen-2017-019433.draft_revisions.pdf]

# BMJ Open

BMJ Open is committed to open peer review. As part of this commitment we make the peer review history of every article we publish publicly available.

When an article is published we post the peer reviewers' comments and the authors' responses online. We also post the versions of the paper that were used during peer review. These are the versions that the peer review comments apply to.

The versions of the paper that follow are the versions that were submitted during the peer review process. They are not the versions of record or the final published versions. They should not be cited or distributed as the published version of this manuscript.

BMJ Open is an open access journal and the full, final, typeset and author-corrected version of record of the manuscript is available on our site with no access controls, subscription charges or pay-per-view fees (<http://bmjopen.bmj.com>).

If you have any questions on BMJ Open's open peer review process please email [editorial.bmjopen@bmj.com](mailto:editorial.bmjopen@bmj.com)

# BMJ Open

## Family-Focused Practices in Addictions: A Scoping Review Protocol

|                               |                                                                                                                                     |
|-------------------------------|-------------------------------------------------------------------------------------------------------------------------------------|
| Journal:                      | <i>BMJ Open</i>                                                                                                                     |
| Manuscript ID                 | bmjopen-2017-019433                                                                                                                 |
| Article Type:                 | Protocol                                                                                                                            |
| Date Submitted by the Author: | 01-Sep-2017                                                                                                                         |
| Complete List of Authors:     | Kourgiantakis, Toula ; University of Toronto, Factor-Inwentash Faculty of Social Work<br>Ashcroft, Rachelle; University of Toronto, |
| Keywords:                     | Addiction, MENTAL HEALTH, Family, Substance use, Problem gambling                                                                   |
|                               |                                                                                                                                     |

SCHOLARONE™  
Manuscripts

view only

1  
2  
3 Family-Focused Practices in Addictions: A Scoping Review Protocol  
4  
5  
6  
7  
8  
9  
10  
11  
12  
13

14 Toula Kourgiantakis<sup>1</sup>

15  
16  
17 Rachelle Ashcroft<sup>1</sup>  
18  
19  
20  
21  
22  
23  
24  
25  
26  
27  
28  
29  
30  
31  
32  
33  
34  
35  
36  
37

38 <sup>1,2</sup>Factor-Inwentash Faculty of Social Work, University of Toronto, Toronto, ON,  
39 Canada  
40

41 Corresponding Author:  
42 Toula Kourgiantakis, PhD, RSW, RMFT  
43 246 Bloor Street West  
44 Toronto, Ontario  
45 Canada M5S 1V4  
46 416-978-4176  
47 [toula.kourgiantakis@utoronto.ca](mailto:toula.kourgiantakis@utoronto.ca)  
48  
49  
50

51  
52 Word count: 1789  
53  
54  
55  
56  
57  
58  
59

## Abstract

**Introduction:** Families are significantly impacted by addictions and family involvement in treatment can reduce the harms and improve treatment entry, treatment completion and treatment outcomes for the individual coping with an addiction. Although the benefits of family-focused practices in addictions have been documented, services continue to have an individual focus and research on this topic is also limited. The objective of this study is to map the extent, range, and nature of evidence available examining family interventions in addictions and identify gaps that can guide future research, policy and practice. **Methods and analysis:** This is a scoping review using the five-stage framework developed by Arksey and O'Malley.<sup>1</sup> We will include published and unpublished empirical studies focusing on any type of family interventions in addiction treatment between 2000 to present in English or French. A reviewer will search for literature that meets the inclusion criteria through the following electronic databases: MEDLINE, PsycINFO, and Social Services Abstracts. For a comprehensive search, we will also hand search reference lists, websites, and key journals. Data will be charted and sorted using a qualitative thematic analysis approach and also a narrative summary approach. **Ethics and dissemination:** This review will be the first to examine family-focused practices for both substance use and problem gambling. It will provide information about existing service provisions and gaps in practice. This review can be used to start moving toward the development of best practices for families in addiction treatment. The results will be disseminated through a peer-reviewed journal and at mental health and addiction conferences.

### Strengths and Limitations of this Study

- This scoping review will be the first to examine family-focused practices in both substance use and gambling treatment
- Inclusion criteria are broad (English and French, peer-reviewed and grey literature) and this will give the review breadth and comprehensiveness
- The studies included in the review will not be appraised for quality
- Rigour will be enhanced through the use of a data charting form and a transparent, iterative, team approach

For peer review only

## Introduction

There are more than 29.5 million individuals worldwide who have a drug use problem<sup>2</sup> and 76 million people with alcohol use disorder.<sup>3</sup> More recently, there has been more research on behavioural addictions and studies show that problem gambling affects 0.12 – 5.8% of people across five continents.<sup>4</sup> Substance use disorders and problem gambling are linked with multifarious consequences including health concerns,<sup>5</sup> financial difficulties, stigma, discrimination, and isolation.<sup>6</sup> It is estimated that more than 50% of those seeking services for an addiction are also coping with mental illness<sup>7</sup> and many studies have also found that the rates of suicidal ideation, attempts, and completed suicides are elevated for individuals with an addiction.<sup>8-10</sup> There is also an increasing awareness of the impact of addictions not only on individuals, but also on families. More than 100 million family members are affected by a relative's addiction.<sup>11</sup> The addiction of a family member has many adverse effects for family members such as high levels of distress<sup>12, 13</sup> health problems, family conflict, domestic violence, child maltreatment, and financial precarity.<sup>12</sup> Despite the negative impact on families, addiction treatment has historically focused on the individual.<sup>14, 15</sup> Csiernik<sup>16, p.79</sup> described family-focused services as the “neglected aspect of addiction treatment” and other researchers have stated that service providers view family members as ‘adjuncts’ and they are not perceived as an integral part of addiction treatment.<sup>17, p.1361</sup> This creates a significant barrier to family involvement in addictions.<sup>17, 18</sup>

The involvement of family members in routine addiction treatment has been documented as important for two important and interrelated reasons. First, as mentioned previously, families are negatively affected and family-focused services can help reduce

1  
2  
3 the harm to individual family members and to the entire family unit.<sup>19</sup> A second  
4  
5 compelling reason for involving families in addiction treatment is that family  
6  
7 involvement increases treatment entry, enhances treatment completion, and is also linked  
8  
9 with better treatment outcomes for the individual coping with the addiction.<sup>20-22</sup> This is  
10  
11 relevant when considering the fact that only 20% (or fewer) of individuals with substance  
12  
13 use disorders seek treatment<sup>23</sup> and among problem gambling individuals only 3–6 % seek  
14  
15 professional treatment.<sup>24</sup> Among those who receive treatment, approximately 50% drop  
16  
17 out of treatment and treatment completion is one of the factors most closely associated  
18  
19 with positive treatment outcomes.<sup>25,26</sup> Although studies have documented robust  
20  
21 evidence when involving families in addiction treatment, most services target the  
22  
23 individual with the addiction and there is little evidence of family-focused approaches in  
24  
25 addiction service provisions.<sup>14</sup>

26  
27  
28  
29  
30  
31       Addiction researchers have identified three categories of family interventions: 1)  
32  
33 working with family members to promote the entry and engagement in treatment of the  
34  
35 individual with the addiction, 2) involving family members in the treatment of the  
36  
37 individual with the addiction, and 3) providing services to family members in their own  
38  
39 right.<sup>15,19</sup> There have been a number of studies on the first two categories and a paucity  
40  
41 of research on the services to families in their own right.<sup>15</sup> However, the research on  
42  
43 family involvement is still limited overall with most studies focusing on specific family  
44  
45 members (e.g. spouses) or specific interventions. Moreover, to our knowledge there have  
46  
47 not been any scoping reviews on family involvement in both substance use and problem  
48  
49 gambling treatment combined.<sup>27</sup> Disordered gambling is the only behavioural addiction  
50  
51 in the DSM-5 and it is classified with substance use disorders due to their similarities in  
52  
53  
54  
55  
56  
57  
58  
59  
60

1  
2  
3 symptomatology.<sup>28</sup> There has been more robust research in substance use disorders and it  
4  
5 is important to examine the breadth and depth in the research on both types of addictions  
6  
7 to advance our understanding of family involvement and have a synthesis and analysis of  
8  
9 existing family interventions. This scoping review will elucidate our understanding of  
10  
11 gaps in service provisions and will be an important guide to developing best practices for  
12  
13 families in addiction treatment.  
14  
15

### 16 17 **Study Objectives**

18  
19 The objectives for this scoping review on family involvement and interventions in  
20  
21 addictions are as follows:  
22  
23

- 24 • Map and categorise the extent, range and nature of evidence available in peer-  
25 reviewed and grey literature examining family interventions in substance use  
26 disorders and problem gambling;  
27  
28
- 29 • Identify gaps to guide future research, policy development and service provisions.  
30  
31  
32

### 33 34 **Methods and Analysis**

35  
36 We will conduct a scoping review to examine the literature on family involvement  
37  
38 in addictions using a methodological framework developed by Arksey and O'Malley<sup>1</sup> and  
39  
40 enhanced by Levac, Colquhoun and O'Brien.<sup>29</sup> A scoping review is suitable for this topic  
41  
42 area as it is defined as “a form of knowledge synthesis that addresses an exploratory  
43  
44 research question aimed at mapping key concepts, types of evidence, and gaps in research  
45  
46 related to a defined area or field by systematically searching, selecting and synthesizing  
47  
48 knowledge.”<sup>30, p. 1292-1294</sup> This method includes five stages: 1) identifying the research  
49  
50 question, 2) identifying relevant studies, 3) study selection, 4) charting the data, and 5)  
51  
52 collating, summarising and reporting the results. The aim of this review is for it to serve  
53  
54  
55  
56  
57  
58  
59  
60



1  
2  
3 as a report that can guide the development of best practices for families in addiction  
4  
5 treatment.  
6

### 7 8 **Stage 1: Identifying the research question**

9  
10 Scoping reviews comprise broad research questions as their aim is to synthesize  
11  
12 breadth of evidence on a clearly identified area of inquiry.<sup>29</sup> Through consultation with  
13  
14 our research team, we developed one broad research question: What are the family  
15  
16 interventions or practices that have been implemented and examined in adult addiction  
17  
18 treatment? Levac et al.<sup>29</sup> recommend that researchers define study concepts and target  
19  
20 populations in scoping reviews. For this review, we define family broadly to include kin  
21  
22 and significant others and this term also includes diverse family members or relationships  
23  
24 including, but not limited to partners, spouses, siblings, friends, adult children and  
25  
26 parents. The term addiction encompasses any substance misuse (alcohol or drugs), as  
27  
28 well as problem gambling. Interventions or practices include any method of involving  
29  
30 family members in addiction treatment that has been implemented and empirically  
31  
32 examined. Treatment refers to any services for an adult coping with an addiction, for a  
33  
34 family member coping with the addiction of a significant other, or services for the family  
35  
36 unit when there is a family member with an addiction.  
37  
38  
39  
40  
41

### 42 **Stage 2: Identifying relevant studies**

43  
44 The comprehensive search strategy was developed in collaboration with the  
45  
46 research assistants, the study's principal and co-investigators (TK and RA), and a health  
47  
48 sciences librarian. Relevant studies will be identified by searching the following  
49  
50 electronic databases: MEDLINE, PsycINFO, and Social Services Abstracts. The search  
51  
52 will cover 2000 – present. To ensure that the scoping review captures the breadth of  
53  
54  
55  
56  
57  
58  
59  
60

literature, we will also hand-search reference lists of included studies, key journals, as well as websites of addiction related organisations including Canadian Centre on Substance Use and Addiction (CCSA), Gambling Research Exchange Ontario (GREO), Addiction and the Family International Network (AFINet), and Substance Use and Mental Health Services Administration (SAMHSA). A preliminary search conducted by the research assistant and reviewed by the primary investigator helped refine the search terms and protocol. All literature searches will be completed by a research assistant who will be supervised and guided by the primary investigator (TK). The search includes several terms that relate to these concepts: family, addiction, and practice (see Table 1).

Table 1: Search terms for the databases

| Concept   | Search terms                                                                                                                                                                                                           |
|-----------|------------------------------------------------------------------------------------------------------------------------------------------------------------------------------------------------------------------------|
| Family    | famil* OR significant other* OR conjoin* OR sibling* OR spous* OR couple* OR partner*                                                                                                                                  |
| Addiction | addict* OR abus* OR problem* OR misuse OR use* adj2 alcohol OR drug* OR substance OR gambl*                                                                                                                            |
| Practice  | therap* OR counsel* OR psychotherap* OR psychoeducation* OR (famil* OR psychological OR addiction OR gambl* OR substance* OR alcohol* OR drug* OR group*) adj (interven* OR treatment* OR support OR help OR service*) |

### Stage 3: Study selection

We are following recommendations made by Levac et al.<sup>29</sup> and will use a transparent, iterative team approach to refine the search strategy and this will be an iterative process to finalise inclusion and exclusion criteria. The review process consists of two stages: first by screening of titles and abstracts and second by full-text screening. A research assistant will review using the selection criteria and will be supervised closely by the lead researcher. The research assistant will mark the selections under review with

1  
2  
3 'include,' 'exclude,' or 'uncertain.' Levac et al.<sup>29</sup> noted that it is important to clarify the  
4 process of decision making and we have determined that uncertainties will be discussed  
5 with the lead researcher and a third investigator will be included when we cannot reach  
6 resolution. The following inclusion criteria will be used to guide the search and will also  
7 be used when reviewing articles: 1) study focuses on any type of family involvement or  
8 intervention in addiction treatment for family members who have a significant other  
9 coping with an addiction, 2) addiction includes alcohol, drugs and gambling at any level  
10 of severity, 3) published or unpublished empirical studies that use quantitative,  
11 qualitative or mixed methods, 4) written in English or French, and 5) between 2000 -  
12 present. Exclusion criteria that have been identified are: 1) studies that focus on  
13 addictions in children or adolescents <18 years of age, 2) literature reviews, and 3)  
14 empirical studies that focus on the impact of addiction on family members, but do not  
15 examine involvement of family members in treatment.  
16  
17  
18  
19  
20  
21  
22  
23  
24  
25  
26  
27  
28  
29  
30  
31

#### 32 33 **Stage 4: Charting the data**

34  
35 Our data will be charted and sorted according to key themes using a qualitative  
36 thematic analysis approach,<sup>31</sup> as well as a narrative summary method.<sup>1</sup> Charting will be  
37 conducted by the research assistant and reviewed by the lead researcher. We will chart  
38 extracted data using a data charting form on Excel. Following the recommendation of  
39 Daudt et al.<sup>32</sup> we will assign each paper an identifying number which will minimise  
40 errors and facilitate tracking of included and excluded articles. We also followed the  
41 recommendations by Levac et al.<sup>29</sup> to make charting an iterative process. The research  
42 assistant did a preliminary extraction of 10 articles with some preliminary categories for  
43 the chart and the charting was reviewed by the lead researcher. The research team  
44  
45  
46  
47  
48  
49  
50  
51  
52  
53  
54  
55  
56  
57  
58  
59  
60

1  
2  
3 discussed the themes and variables and updated the charting form. The themes and  
4  
5 variables that we will be charting include: author, title, peer reviewed or grey literature  
6  
7 paper, country where study was conducted, research aims, methods, sample size,  
8  
9 individual with addiction (if specified), family member (if specified), definition of family  
10  
11 and family involvement (if provided), addiction type, intervention type, harm reduction  
12  
13 or abstinence approach (if specified), and key findings.  
14  
15

### 16 17 **Stage 5: Collating, summarising and reporting the results**

18  
19 Levac et al.<sup>29</sup> suggest that this stage is divided in three distinct steps. With this in  
20  
21 mind, our research team will follow these steps in the final stage of the scoping review:  
22  
23 1) analyse extracted data using a numerical summary analysis and qualitative thematic  
24  
25 analysis; 2) disseminate the results of the scoping review, and 3) discuss implications for  
26  
27 future research, policy and practice.  
28  
29

### 30 31 **Ethics and Dissemination**

32  
33 This paper presents the protocol for a scoping review of family practices in  
34  
35 addiction treatment. Ethics approval is not necessary as the data is collected from  
36  
37 publicly available sources. This review will advance knowledge on the ways family  
38  
39 members are involved in treatment when a significant other has a substance use or  
40  
41 gambling problem. The results will be disseminated through a peer-reviewed journal and  
42  
43 will also be reported at local, national and international conferences on addictions and  
44  
45 mental health.  
46  
47  
48  
49  
50  
51  
52  
53  
54  
55  
56  
57  
58  
59  
60

1  
2  
3 **Contributions of authors:** TK contributed to the project idea and both TK and RA  
4 provided guidance to the research assistant, and design of the search strategy. TK  
5 contributed to the literature review and RA and TK contributed to the writing and editing  
6 of the protocol. Both authors have made substantive intellectual contributions to the  
7 development of this protocol. Both read and approved the manuscript.  
8  
9

10 **Funding:** This research received no specific grant from any funding agency in the public,  
11 commercial or not-for-profit sectors.  
12

13 **Competing interests:** There are no competing interests.  
14  
15

16 **Data Sharing Statement:** The dataset is available by contacting the corresponding  
17 author.  
18  
19  
20  
21  
22  
23  
24  
25  
26  
27  
28  
29  
30  
31  
32  
33  
34  
35  
36  
37  
38  
39  
40  
41  
42  
43  
44  
45  
46  
47  
48  
49  
50  
51  
52  
53  
54  
55  
56  
57  
58  
59  
60

## References

1. Arksey H., & O'Malley L. Scoping studies: towards a methodological framework. *Int J Soc Res Methodol*. 2005; 8:19-32.
2. United Nations Office on Drugs and Crime. *World Drug Report 2017*. United Nations, (2017).
3. World Health Organization. Substance Abuse Dept. Global status report: Alcohol policy. *World Health Organization*; (2004).
4. Calado F, Griffiths MD. Problem gambling worldwide: An update and systematic review of empirical research (2000–2015). *J Behav Addict*. 2016 Oct 26;5(4):592-613.
5. Rehm J. The risks associated with alcohol use and alcoholism. *Alcohol Res Health*. 2011;34(2):135.
6. Ahern J, Stuber J, Galea S. Stigma, discrimination and the health of illicit drug users. *Drug Alcohol Depend*. 2007 May 11;88(2):188-96.
7. Canadian Centre on Substance abuse. Substance abuse in Canada: Concurrent disorders. *Canadian Centre on Substance Abuse*, (2009).
8. Borges G, Loera CR. Alcohol and drug use in suicidal behaviour. *Curr Opin Psychiatry*. 2010 May 1;23(3):195-204.
9. Darvishi N, Farhadi M, Haghtalab T, et al. Alcohol-related risk of suicidal ideation, suicide attempt, and completed suicide: a meta-analysis. *PLoS One*. 2015 May 20;10(5):e0126870.
10. Schneider B. Substance use disorders and risk for completed suicide. *Arch Suicide Res*. 2009 Oct 15;13(4):303-16.
11. Orford J, Velleman R, Natera G, et al. Addiction in the family is a major but neglected contributor to the global burden of adult ill-health. *Soc Sci Med*. 2013 Feb 28; 78:70-7.
12. Copello A, Templeton L, Orford J, et al. The relative efficacy of two levels of a primary care intervention for family members affected by the addiction problem of a close relative: a randomized trial. *Addiction*. 2009 Jan 1;104(1):49-58.

13. Ray GT, Mertens JR, Weisner C. Family members of people with alcohol or drug dependence: health problems and medical cost compared to family members of people with diabetes and asthma. *Addiction*. 2009 Feb 1;104(2):203-14.
14. Copello AG, Templeton L, Velleman R. Family interventions for drug and alcohol misuse: is there a best practice? *Curr Opin Psychiatry*. 2006 May 1;19(3):271-6.
15. Kourgiantakis T, Saint-Jacques MC, Tremblay J. Facilitators and Barriers to Family Involvement in Problem Gambling Treatment. *Int J Ment Health Addict*. 2017:1-22.
16. Csiernik R. Counseling for the family: The neglected aspect of addiction treatment in Canada. *J Soc Work Pract Addict*. 2002 Jan 1;2(1):79-92.
17. Copello A, Orford J. Addiction and the family: is it time for services to take notice of the evidence? *Addiction*. 2002 Nov 1;97(11):1361-3.
18. Lee CE, Christie MM, Copello A, et al. Barriers and enablers to implementation of family-based work in alcohol services: A qualitative study of alcohol worker perceptions. *Drugs (Abingdon Engl)*. 2012 Jun 1;19(3):244-52.
19. Copello AG, Velleman RD, Templeton LJ. Family interventions in the treatment of alcohol and drug problems. *Drug Alcohol Rev*. 2005 Jan 1;24(4):369-85.
20. Edwards ME, Steinglass P. Family therapy treatment outcomes for alcoholism. *J Marital Fam Ther*. 1995 Oct 1;21(4):475-509.
21. Epstein EE, McCrady BS. Behavioral couples' treatment of alcohol and drug use disorders: Current status and innovations. *Clin Psychol Rev*. 1998 Sep 30;18(6):689-711.
22. Meads C, Ting S, Dretzke J, et al. A systematic review of the clinical and cost-effectiveness of psychological therapy involving family and friends in alcohol misuse or dependence. *Health Technol Assess Rep*. 2007;65:97.
23. Hasin D, Keyes K. The epidemiology of alcohol and drug disorders. In: *Addiction Medicine* 2010 (pp. 23-49). Springer New York.
24. Suurvali H, Hodgins D, Toneatto T, et al. Treatment seeking among Ontario problem gamblers: Results of a population survey. *Psychiatr Serv*. 2008 Nov;59(11):1343-6.
25. Brorson HH, Arnevik EA, Rand-Hendriksen K, et al. Drop-out from addiction treatment: A systematic review of risk factors. *Clin Psychol Rev*. 2013 Dec 31;33(8):1010-24.

- 1
- 2
- 3
- 4
- 5 26. Ladouceur R, Gosselin P, Laberge M, et al. Dropouts in clinical research: do
- 6 results reported reflect clinical reality? *Behav Ther (N Y N Y)*. 2001;24(2):44-6.
- 7
- 8 27. Hampson CL. *Integrating family-focused practice into routine addiction*
- 9 *services* (Doctoral dissertation, University of Birmingham).
- 10
- 11 28. American Psychiatric Association. Diagnostic and statistical manual of mental
- 12 disorders (DSM-5®). *American Psychiatric Pub*; 2013 May 22.
- 13
- 14 29. Levac D, Colquhoun H, O'Brien K. Scoping studies: advancing the methodology.
- 15 *Implementation Science*. 2010; 5:69.
- 16
- 17 30. Colquhoun, H., Levac, D., O'Brien, K., et al. Scoping reviews: time for clarity in
- 18 definition, methods and reporting. *J Clin Epidemiol*. 2014; 67:1291-1294.
- 19
- 20 31. The Joanna Briggs Institute. Joanna Briggs Institute Reviewers' Manual: 2015
- 21 edition / Supplement. *JBIR Database System Rev Implement Rep*.
- 22
- 23 32. Daudt HM, van Mossel C, Scott SJ. Enhancing the scoping study methodology: a
- 24 large, inter-professional team's experience with Arksey and O'Malley's
- 25 framework. *BMC Med Res Methodol*. 2013; 13:48.
- 26
- 27
- 28
- 29
- 30
- 31
- 32
- 33
- 34
- 35
- 36
- 37
- 38
- 39
- 40
- 41
- 42
- 43
- 44
- 45
- 46
- 47
- 48
- 49
- 50
- 51
- 52
- 53
- 54
- 55
- 56
- 57
- 58
- 59
- 60



# BMJ Open

## Family-Focused Practices in Addictions: A Scoping Review Protocol

|                                 |                                                                                                                                     |
|---------------------------------|-------------------------------------------------------------------------------------------------------------------------------------|
| Journal:                        | <i>BMJ Open</i>                                                                                                                     |
| Manuscript ID                   | bmjopen-2017-019433.R1                                                                                                              |
| Article Type:                   | Protocol                                                                                                                            |
| Date Submitted by the Author:   | 07-Dec-2017                                                                                                                         |
| Complete List of Authors:       | Kourgiantakis, Toula ; University of Toronto, Factor-Inwentash Faculty of Social Work<br>Ashcroft, Rachelle; University of Toronto, |
| <b>Primary Subject Heading</b>: | Addiction                                                                                                                           |
| Secondary Subject Heading:      | Mental health                                                                                                                       |
| Keywords:                       | Addiction, Family, Substance use, Problem gambling, MENTAL HEALTH                                                                   |
|                                 |                                                                                                                                     |

SCHOLARONE™  
Manuscripts

Peer Review Only

1  
2  
3 Family-Focused Practices in Addictions: A Scoping Review Protocol  
4  
5  
6  
7  
8  
9  
10  
11  
12  
13

14 Toula Kourgiantakis<sup>1</sup>

15  
16  
17 Rachelle Ashcroft<sup>2</sup>  
18  
19  
20  
21  
22  
23  
24  
25  
26  
27  
28  
29  
30  
31  
32  
33  
34  
35  
36  
37

38 <sup>1,2</sup>Factor-Inwentash Faculty of Social Work, University of Toronto, Toronto, ON,  
39 Canada  
40

41 Corresponding Author:  
42 Toula Kourgiantakis, PhD, RSW, RMFT  
43 246 Bloor Street West  
44 Toronto, Ontario  
45 Canada M5S 1V4  
46 416-978-4176  
47 [toula.kourgiantakis@utoronto.ca](mailto:toula.kourgiantakis@utoronto.ca)  
48  
49  
50  
51  
52  
53  
54  
55  
56  
57  
58  
59  
60

## Abstract

**Introduction:** Families are significantly impacted by addictions and family involvement in treatment can reduce the harms and improve treatment entry, treatment completion and treatment outcomes for the individual coping with an addiction. Although the benefits of family-focused practices in addictions have been documented, services continue to have an individual focus and research on this topic is also limited. The objective of this study is to map the extent, range, and nature of evidence available examining family interventions in addictions and identify gaps to guide future research, policy and practice.

**Methods and analysis:** This is a scoping review using the five-stage framework developed by Arksey and O'Malley. We will include published and unpublished empirical studies focusing on any type of family interventions in addiction treatment between 2000 to present in English or French. A reviewer will search for literature that meets the inclusion criteria through the following electronic databases: MEDLINE, PsycINFO, and Social Services Abstracts. For a comprehensive search, we will also hand search reference lists, websites, and key journals. Data will be charted and sorted using a thematic analysis approach. **Ethics and dissemination:** This review will be the first to examine all forms of family-focused practices for both substance use and problem gambling treatment for adults. It will provide information about existing service provisions and gaps in practice. This review can be used to start moving toward the development of best practices for families in addiction treatment. The results will be disseminated through a peer-reviewed journal and at mental health and addiction conferences.

### Strengths and Limitations of this Study

- This scoping review will be the first to examine family-focused practices in both substance use and gambling adult treatment
- Inclusion criteria are broad (English and French, peer-reviewed and grey literature) and this will give the review breadth and comprehensiveness
- The studies included in the review will not be appraised for quality
- Rigour will be enhanced through the use of a data charting form and a transparent, iterative, team approach

For peer review only

## Introduction

There are more than 29.5 million individuals worldwide who have a drug use problem<sup>1</sup> and 76 million people with alcohol use disorder.<sup>2</sup> More recently, there has been more research on behavioural addictions and studies show that problem gambling affects 0.12 – 5.8% of people across five continents.<sup>3</sup> Substance use disorders and problem gambling are linked with multifarious consequences including health concerns,<sup>4</sup> financial difficulties,<sup>5, 6</sup> stigma, discrimination, and isolation.<sup>7</sup> It is estimated that more than 50% of those seeking services for an addiction are also coping with mental illness<sup>8</sup> and many studies have also found that the rates of suicidal ideation, attempts, and completed suicides are elevated for individuals with an addiction.<sup>9-11</sup> There is also an increasing awareness of the impact of addictions not only on individuals, but also on families. More than 100 million family members are affected by a relative's addiction.<sup>12</sup> The addiction of a family member has many adverse effects for families such as high levels of distress, health problems,<sup>5, 13</sup> family conflict, domestic violence, child maltreatment,<sup>12</sup> and financial precarity.<sup>5, 6, 12</sup> Studies also report that the health costs for family members coping with the addiction of a significant other are considerably higher than family members who do not have a family member with an addiction.<sup>5, 6</sup> Despite the negative impact on families, addiction treatment has historically focused on the individual.<sup>14, 15</sup> Csiernik<sup>16, p.79</sup> described family-focused services as the “neglected aspect of addiction treatment” and other researchers have stated that service providers view family members as ‘adjuncts’ and they are not perceived as an integral part of addiction treatment.<sup>17, p.1361</sup> This creates a significant barrier to family involvement in addictions.<sup>15, 17, 18</sup>

1  
2  
3 The involvement of family members in routine addiction treatment has been  
4  
5 documented as important for two important and interrelated reasons. First, as mentioned  
6  
7 previously, families are negatively affected and family-focused services can help reduce  
8  
9 the harm to individual family members and to the entire family unit.<sup>19</sup> A second  
10  
11 compelling reason for involving families in addiction treatment is that family  
12  
13 involvement increases treatment entry, enhances treatment completion, and is also linked  
14  
15 with better treatment outcomes for the individual coping with the addiction.<sup>20-22</sup> This is  
16  
17 relevant when considering the fact that only 20% (or fewer) of individuals with substance  
18  
19 use disorders seek treatment<sup>23</sup> and among problem gambling individuals only 3–6 % seek  
20  
21 professional treatment.<sup>24</sup> Among those who receive treatment, approximately 50% drop  
22  
23 out of treatment and treatment completion is one of the factors most closely associated  
24  
25 with positive treatment outcomes.<sup>25,26</sup> Although studies have documented robust  
26  
27 evidence when involving families in addiction treatment, most services target the  
28  
29 individual with the addiction and there is little evidence of family-focused approaches in  
30  
31 addiction service provisions.<sup>14</sup>

32  
33  
34  
35  
36  
37  
38  
39  
40  
41  
42  
43  
44  
45  
46  
47  
48  
49  
50  
51  
52  
53  
54  
55  
56  
57  
58  
59  
60  
Addiction researchers have identified three categories of family interventions: 1)  
working with family members to promote the entry and engagement in treatment of the  
individual with the addiction, 2) involving family members in the treatment of the  
individual with the addiction, and 3) providing services to family members in their own  
right.<sup>15,19</sup> There have been a number of substance use studies on the first two categories.  
For the first category a few studies have evaluated the Community Reinforcement  
Approach and Family Training (CRAFT) intervention.<sup>27-29</sup> The CRAFT program teaches  
family members coping skills and also facilitates the entry of the PG individual in

1  
2  
3 treatment.<sup>29</sup> The second category of family interventions has also been studied, but it  
4 focuses on conjoint treatment and it has largely targeted spouses (e.g. Alcohol Behaviour  
5 Couple Therapy (ABCT)).<sup>30</sup> The third category of family interventions focuses on  
6 services given directly to families and it has received the least attention. While there  
7 have been scant studies on the third category of family interventions, a group of UK  
8 researchers have developed the Stress-Strain-Coping-Support Model aimed at reducing  
9 the stress and strain to families and increasing support and coping skills.<sup>31</sup> This approach  
10 has been evaluated in a primary care setting and shows promising results.<sup>13</sup> The SSCS  
11 model has similarities to the family psychoeducation approach - an evidence-based  
12 practice in mental health and a commonly used family approach for schizophrenia.<sup>32</sup> The  
13 family psychoeducation literature states that all interventions for families should include  
14 the “Big Three.” The “Big Three” includes information about the addiction/mental  
15 illness, coping skill development, and support from peers and professionals. Despite the  
16 fact that there has been some research (notably in the first two categories), this is still  
17 limited even though the benefits of family involvement and the adverse effects of  
18 addictions on families have been documented. In light of the low rates of treatment  
19 seeking and high rates of attrition from treatment for individuals with addictions, as well  
20 as the pervasive adverse effects of addictions on families, it is critical that family-focused  
21 services are available and accessible for all families. The robust research in mental  
22 health has demonstrated that the “Big Three” (psychoeducation, support, and coping  
23 skills) is an evidence-based practice.<sup>32</sup> The SSCS model has similar tenets and practices,  
24 but requires more research and implementation in policy and practice. Researchers have  
25 attributed this neglect to “a consequence of the lack of a family orientation in  
26  
27  
28  
29  
30  
31  
32  
33  
34  
35  
36  
37  
38  
39  
40  
41  
42  
43  
44  
45  
46  
47  
48  
49  
50  
51  
52  
53  
54  
55  
56  
57  
58  
59  
60

1  
2  
3 professional training and practice, plus the existence of a number of models of family  
4 functioning that cast family members in a negative light.”<sup>33, p. 22</sup> To our knowledge there  
5  
6 have not been any reviews on family involvement in both substance use and problem  
7  
8 gambling treatment for adults.<sup>34</sup> Disordered gambling is the only behavioural addiction in  
9  
10 the DSM-5 and it is classified with substance use disorders due to their similarities in  
11  
12 symptomatology.<sup>35</sup> This scoping review will focus on all three forms of family  
13  
14 involvement in substance use and gambling treatment to elucidate our understanding of a  
15  
16 range of programs that promote family-focused treatment. It will also identify any gaps  
17  
18 in service provisions, as well as barriers to implementation of family-focused practices  
19  
20 that have been identified in the literature. This will be an important guide to help move  
21  
22 towards best practices for families in addiction treatment. There are currently no clearly  
23  
24 identified best practices and this scoping review can be used by both policy makers and  
25  
26 clinical settings to develop policies and implement best practices in addiction treatment  
27  
28 with various family-focused interventions.  
29  
30  
31  
32  
33  
34

### 35 **Study Objectives**

36  
37 The objectives for this scoping review on family involvement and interventions in  
38  
39 addictions are as follows:  
40  
41

- 42  
43 • Map and categorise the extent, range and nature of evidence available in peer-  
44  
45 reviewed and grey literature examining family interventions in substance use  
46  
47 disorders and problem gambling;  
48  
49
- 50 • Identify recent family interventions in adult addiction treatment programs, as well  
51  
52 as treatment gaps to guide future research, policy development and service  
53  
54 provisions.  
55  
56  
57  
58  
59



## Methods and Analysis

We will conduct a scoping review to examine the literature on family involvement in addictions using a methodological framework developed by Arksey and O'Malley<sup>36</sup> and enhanced by Levac, Colquhoun and O'Brien.<sup>37</sup> A scoping review is suitable for this topic area as it is defined as “a form of knowledge synthesis that addresses an exploratory research question aimed at mapping key concepts, types of evidence, and gaps in research related to a defined area or field by systematically searching, selecting and synthesizing knowledge.”<sup>38, p. 1292-1294</sup> This method includes five stages: 1) identifying the research question, 2) identifying relevant studies, 3) study selection, 4) charting the data, and 5) collating, summarising and reporting the results. The aim of this review is for it to serve as a report that can guide the development of best practices for families in addiction treatment.

### Stage 1: Identifying the research question

Scoping reviews comprise broad research questions as their aim is to synthesise the breadth of evidence on a clearly identified area of inquiry.<sup>37</sup> Through consultation with our research team, we developed one broad research question: What are the family interventions or practices that have been implemented and examined in adult addiction treatment? Levac et al.<sup>37</sup> recommend that researchers define study concepts and target populations in scoping reviews. For this review, we define family broadly to include kin and significant others and this term also includes diverse family members or relationships including, but not limited to partners, spouses, siblings, friends, adult children and parents. The term addiction encompasses any problematic substance use (alcohol or drugs), as well as problem gambling. Interventions or practices include any method of

1  
2  
3 involving family members in addiction treatment that has been implemented and  
4 empirically examined. Treatment refers to any services for an adult coping with an  
5 addiction, problematic substance use or problem gambling.  
6  
7

## 8 9 10 **Stage 2: Identifying relevant studies**

11  
12 The comprehensive search strategy was developed in collaboration with the  
13 study's principal and co-investigators (TK and RA), a health sciences librarian at the  
14 University of Toronto, and the research assistants who will help conduct the scoping  
15 review. Relevant studies will be identified by searching the following electronic  
16 databases: MEDLINE, PsycINFO, and Social Services Abstracts. The researchers  
17 selected a cross-section of databases that include the range of literature spanning health  
18 care, psychology, psychiatry, social work, and other social sciences. An initial scan of  
19 several databases demonstrated that the databases selected were more likely to identify  
20 results that are related to the focus of this scoping review. Other databases were not  
21 included in this study because the initial scan resulted in thousands of results that were  
22 not relevant to the scope of this study. However, to ensure that the scoping review  
23 captures the breadth of literature, the research team will also extensively hand-search  
24 various reference lists of included studies, key journals, as well as websites of addiction  
25 related organisations including the Canadian Centre on Substance Use and Addiction  
26 (CCSA), Gambling Research Exchange Ontario (GREO), Addiction and the Family  
27 International Network (AFINet), and Substance Use and Mental Health Services  
28 Administration (SAMHSA). The search will cover 2000 to present and this limited date  
29 range was selected as we are interested in recent addiction treatment approaches  
30 involving families in order for this to be most relevant for current treatment programs. A  
31  
32  
33  
34  
35  
36  
37  
38  
39  
40  
41  
42  
43  
44  
45  
46  
47  
48  
49  
50  
51  
52  
53  
54  
55  
56  
57  
58  
59  
60

preliminary search conducted by the research assistant and reviewed by the primary investigator helped refine the search terms and protocol. All literature searches will be completed by a research assistant who will be supervised and guided by the primary investigator (TK). The search includes several terms that relate to these concepts: family, addiction, and practice (see Table 1).

Table 1: Search terms for the databases

| Concept   | Search terms                                                                                                                                                                                                           |
|-----------|------------------------------------------------------------------------------------------------------------------------------------------------------------------------------------------------------------------------|
| Family    | famil* OR significant other* OR conjoin* OR sibling* OR spous* OR couple* OR partner*                                                                                                                                  |
| Addiction | addict* OR abus* OR problem* OR misuse OR use* adj2 alcohol OR drug* OR substance OR gambl*                                                                                                                            |
| Practice  | therap* OR counsel* OR psychotherap* OR psychoeducation* OR (famil* OR psychological OR addiction OR gambl* OR substance* OR alcohol* OR drug* OR group*) adj (interven* OR treatment* OR support OR help OR service*) |

### Stage 3: Study selection

We are following recommendations made by Levac et al.<sup>37</sup> and will use a transparent, iterative team approach to refine the search strategy and this will be an iterative process to finalise inclusion and exclusion criteria. The review process consists of two stages: first by screening of titles and abstracts and second by full-text screening. A research assistant will review using the selection criteria and will be supervised closely by the lead researcher. The research assistant will mark the selections under review with 'include,' 'exclude,' or 'uncertain.' Levac et al.<sup>37</sup> noted that it is important to clarify the process of decision making and we have determined that uncertainties will be discussed with the lead researcher and a third investigator will be included when we cannot reach resolution. The following inclusion criteria will be used to guide the search and will also

1  
2  
3 be used when reviewing articles: 1) study focuses on any type of family involvement or  
4 intervention in addiction treatment for family members who have a significant other  
5 coping with an addiction, 2) addiction includes alcohol, drugs and gambling at any level  
6 of severity, 3) published or unpublished empirical studies that use quantitative,  
7 qualitative or mixed methods, 4) written in English or French, and 5) from 2000 onward.  
8  
9  
10  
11  
12  
13  
14 Exclusion criteria that have been identified are: 1) studies that focus on addictions in  
15 children or adolescents <18 years of age, 2) literature reviews, and 3) empirical studies  
16 that focus on the impact of addiction on family members, but do not examine  
17 involvement of family members in treatment.  
18  
19  
20  
21  
22

#### 23 24 **Stage 4: Charting the data**

25  
26 Our data will be charted and sorted according to key themes using a qualitative  
27 thematic analysis approach.<sup>39,40</sup> This is a commonly used method for scoping reviews and  
28 it involves identifying themes across the literature and synthesising using summary tables  
29 with thematic headings.<sup>39,40</sup> Charting will be conducted by the research assistant and  
30 reviewed by the lead researcher. We will chart extracted data using a data charting form  
31 on Excel. Following the recommendation of Daudt et al.<sup>41</sup> we will assign each paper an  
32 identifying number which will minimise errors and facilitate tracking of included and  
33 excluded articles. We also followed the recommendations by Levac et al.<sup>37</sup> to make  
34 charting an iterative process. The research assistant did a preliminary extraction of 10  
35 articles with some preliminary categories for the chart and the charting was reviewed by  
36 the lead researcher. The research team discussed the themes and variables and updated  
37 the charting form. The themes and variables that we will be charting include: author, title,  
38 peer reviewed or grey literature paper, country where study was conducted, research  
39  
40  
41  
42  
43  
44  
45  
46  
47  
48  
49  
50  
51  
52  
53  
54  
55  
56  
57  
58  
59  
60

1  
2  
3 aims, methods, sample size, individual with addiction (if specified), family member (if  
4 specified), definition of family and family involvement (if provided), addiction type,  
5  
6 intervention type, harm reduction or abstinence approach (if specified), and key findings  
7  
8 of the study. For key findings, we are specifically searching for a study's results on  
9  
10 family involvement in addiction treatment.  
11  
12  
13

### 14 **Stage 5: Collating, summarising and reporting the results**

15  
16  
17 Levac et al.<sup>37</sup> suggest that this stage is divided in three distinct steps. With this in  
18  
19 mind, our research team will follow these steps in the final stage of the scoping review:  
20

21 1) analyse extracted data using a numerical summary analysis and qualitative thematic  
22 analysis; 2) disseminate the results of the scoping review, and 3) discuss implications for  
23  
24 future research, policy and practice.  
25  
26  
27

### 28 **Ethics and Dissemination**

29  
30  
31 This paper presents the protocol for a scoping review of family practices in  
32  
33 addiction treatment. Ethics approval is not necessary as the data is collected from  
34  
35 publicly available sources. This review will advance knowledge on the ways family  
36  
37 members are involved in treatment when a significant other has a substance use or  
38  
39 gambling problem. The results will be disseminated through a peer-reviewed journal and  
40  
41 will also be reported at local, national and international conferences on addictions and  
42  
43 mental health.  
44  
45

46  
47 **Contributions of authors:** TK contributed to the project idea and both TK and RA  
48 provided guidance to the research assistant, and design of the search strategy. TK  
49 contributed to the literature review and RA and TK contributed to the writing and editing  
50 of the protocol. Both authors have made substantive intellectual contributions to the  
51 development of this protocol. Both read and approved the manuscript.  
52

53  
54 **Funding:** This research received no specific grant from any funding agency in the public,  
55 commercial or not-for-profit sectors.  
56  
57  
58  
59

**Competing interests:** There are no competing interests.

**Data Sharing Statement:** The dataset is available by contacting the corresponding author.

### References

1. United Nations Office on Drugs and Crime. World Drug Report 2017. United Nations, 2017.
2. World Health Organization. Substance Abuse Dept. Global status report: Alcohol policy. Geneva: WHO,2004.
3. Calado F, Griffiths MD. Problem gambling worldwide: An update and systematic review of empirical research (2000–2015). *J Behav Addict*. 2016;5(4):592-613.
4. Rehm J. The risks associated with alcohol use and alcoholism. *Alcohol Res Health*. 2011;34(2):135.
5. Ray GT, Mertens JR, Weisner C. Family members of people with alcohol or drug dependence: health problems and medical cost compared to family members of people with diabetes and asthma. *Addiction*. 2009;104(2):203-14.
6. Weisner C, Parthasarathy S, Moore C, Mertens JR. Individuals receiving addiction treatment: are medical costs of their family members reduced? *Addiction*. 2010;105:1226-34.
7. Ahern J, Stuber J, Galea S. Stigma, discrimination and the health of illicit drug users. *Drug Alcohol Depend*. 2007;2:188-96.
8. Canadian Centre on Substance abuse. Substance abuse in Canada: Concurrent disorders. Canadian Centre on Substance Abuse, (2009).
9. Borges G, Loera CR. Alcohol and drug use in suicidal behaviour. *Curr Opin Psychiatry*. 2010;23:195-204.
10. Darvishi N, Farhadi M, Haghtalab T, et al. Alcohol-related risk of suicidal ideation, suicide attempt, and completed suicide: a meta-analysis. *PLoS One*. 2015;10:e0126870.
11. Schneider B. Substance use disorders and risk for completed suicide. *Arch Suicide Res*. 2009;13:303-16.

12. Orford J, Velleman R, Natera G, et al. Addiction in the family is a major but neglected contributor to the global burden of adult ill-health. *Soc Sci Med*. 2013; 78:70-7.
13. Copello A, Templeton L, Orford J, et al. The relative efficacy of two levels of a primary care intervention for family members affected by the addiction problem of a close relative: a randomized trial. *Addiction*. 2009;104:49-58.
14. Copello AG, Templeton L, Velleman R. Family interventions for drug and alcohol misuse: is there a best practice? *Curr Opin Psychiatry*. 2006;19:271-6.
15. Kourgiantakis T, Saint-Jacques MC, Tremblay J. Facilitators and Barriers to Family Involvement in Problem Gambling Treatment. *Int J Ment Health Addict*. 2017:1-22.
16. Csiernik R. Counseling for the family: The neglected aspect of addiction treatment in Canada. *J Soc Work Pract Addict*. 2002;2:79-92.
17. Copello A, Orford J. Addiction and the family: is it time for services to take notice of the evidence? *Addiction*. 2002;97:1361-3.
18. Lee CE, Christie MM, Copello A, et al. Barriers and enablers to implementation of family-based work in alcohol services: A qualitative study of alcohol worker perceptions. *Drugs (Abingdon Engl)*. 2012;19:244-52.
19. Copello AG, Velleman RD, Templeton LJ. Family interventions in the treatment of alcohol and drug problems. *Drug Alcohol Rev*. 2005;24:369-85.
20. Edwards ME, Steinglass P. Family therapy treatment outcomes for alcoholism. *J Marital Fam Ther*. 1995;21:475-509.
21. Epstein EE, McCrady BS. Behavioral couples' treatment of alcohol and drug use disorders: Current status and innovations. *Clin Psychol Rev*. 1998;18:689-711.
22. Meads C, Ting S, Dretzke J, Bayliss S. A systematic review of the clinical and cost-effectiveness of psychological therapy involving family and friends in alcohol misuse or dependence. *Health Technol Assess Rep*. 2007;65:97.
23. Hasin D, Keyes K: The epidemiology of alcohol and drug disorders. In: *Addiction Medicine* Edited by Johnson, BA. New York: Springer; 2010,23-49.
24. Suurvali H, Hodgins D, Toneatto T, et al. Treatment seeking among Ontario problem gamblers: Results of a population survey. *Psychiatr Serv*. 2008;59:1343-6.

- 1
  - 2
  - 3
  - 4
  - 5
  - 6
  - 7
  - 8
  - 9
  - 10
  - 11
  - 12
  - 13
  - 14
  - 15
  - 16
  - 17
  - 18
  - 19
  - 20
  - 21
  - 22
  - 23
  - 24
  - 25
  - 26
  - 27
  - 28
  - 29
  - 30
  - 31
  - 32
  - 33
  - 34
  - 35
  - 36
  - 37
  - 38
  - 39
  - 40
  - 41
  - 42
  - 43
  - 44
  - 45
  - 46
  - 47
  - 48
  - 49
  - 50
  - 51
  - 52
  - 53
  - 54
  - 55
  - 56
  - 57
  - 58
  - 59
  - 60
25. Brorson HH, Arnevik EA, Rand-Hendriksen K, et al. Drop-out from addiction treatment: A systematic review of risk factors. *Clin Psychol Rev.* 2013;33:1010-24.
26. Ladouceur R, Gosselin P, Laberge M, Blaszczynski A. Dropouts in clinical research: do results reported reflect clinical reality? *Behav Ther.* 2001;24:44-6.
27. Bischof G, Iwen J, Freyer-Adam J, Rumpf HJ. Efficacy of the Community Reinforcement and Family Training for concerned significant others of treatment-refusing individuals with alcohol dependence: A randomized controlled trial. *Drug Alcohol Depend.* 2016;163:179-85.
28. Hodgins DC, Toneatto T, Makarchuk K, Skinner W, Vincent S. Minimal treatment approaches for concerned significant others of problem gamblers: a randomized controlled trial. *J Gambl Stud.* 2007;23:215-30.
29. Roozen HG, De Waart R, Van Der Kroft P. Community reinforcement and family training: An effective option to engage treatment-resistant substance-abusing individuals in treatment. *Addiction.* 2010;105:1729-38.
30. McCrady BS, Epstein EE. *Overcoming Alcohol Problems: A Couples-Focused Program Workbook.* New York: Oxford University Press; 2009.
31. Orford J, Copello A, Velleman R, Templeton L. Family members affected by a close relative's addiction: The stress-strain-coping-support model. *Drug (Abingdon Engl).* 2010;17(sup1):36-43.
32. Lucksted A, McFarlane W, Downing D, Dixon L. Recent developments in family psychoeducation as an evidence-based practice. *J Marital Fam Ther.* 2012;38:101-21.
33. Orford J, Natera G, Copello A, Atkinson C, Tiburcio M, Velleman R et al. *Coping with Alcohol and Drug Problems: The Experiences of Family Members in Three Contrasting Cultures.* London: Taylor & Francis, 2005.
34. Hampson CL. *Integrating family-focused practice into routine addiction services (Doctoral dissertation, University of Birmingham), 2012.*
35. American Psychiatric Association. *Diagnostic and statistical manual of mental disorders (DSM-5®).* American Psychiatric Pub; 2013.
36. Arksey H., & O'Malley L. Scoping studies: towards a methodological framework. *Int J Soc Res Methodol.* 2005; 8:19-32.
37. Levac D, Colquhoun H, O'Brien K. Scoping studies: advancing the methodology. *Implementation Science.* 2010; 5:69.



- 1  
2  
3  
4  
5  
6  
7  
8  
9  
10  
11  
12  
13  
14  
15  
16  
17  
18  
19  
20  
21  
22  
23  
24  
25  
26  
27  
28  
29  
30  
31  
32  
33  
34  
35  
36  
37  
38  
39  
40  
41  
42  
43  
44  
45  
46  
47  
48  
49  
50  
51  
52  
53  
54  
55  
56  
57  
58  
59  
60
38. Colquhoun, H., Levac, D., O'Brien, K., et al. Scoping reviews: time for clarity in definition, methods and reporting. *J Clin Epidemiol.* 2014; 67:1291-1294.
39. The Joanna Briggs Institute. Joanna Briggs Institute Reviewers' Manual: 2015 edition / Supplement. JBI Database System Rev Implement Rep.
40. Kastner M, Tricco AC, Soobiah C, Lillie E, Perrier L, Horsley T et al. What is the most appropriate knowledge synthesis method to conduct a review? Protocol for a scoping review. *BMC Med Res Methodol.* 2012;12:114.
41. Daudt HM, van Mossel C, Scott SJ. Enhancing the scoping study methodology: a large, inter-professional team's experience with Arksey and O'Malley's framework. *BMC Med Res Methodol.* 2013; 13:48.
